# Supplementary material for: Growth dynamic curve and gene expression analysis for optimized culture medium of Mycoplasma hyopneumoniae CJ strain
Source: Research Square preprint supplement (doi:10.21203/rs.3.rs-8536078/v1), 2026-01-14
Supplement: Supplementary file 1 [file 674011398167a66076812600.docx]

Table.S1 Metabolic gene qPCR primer sequences.

| **Name** | **Encode Enyzme** | | **Forward** | **Reverse** |
| --- | --- | --- | --- | --- |
| ***GAPDH***  **(Endogenous Control gene)** | | Glyceraldehyde-3-phosphate dehydrogenase | GGAATTGCAATTAGAGTCCCAGT | TCGCTGGAAACGATTGGCTC |
| ***deoB*** | Phosphopentose isomerase | | AGCTCTCGGCCAGAATGAAA | GAATCAAGAATTGATTTCGGCGG |
| ***fba*** | Fructose-1,6-bisphosphate aldolase | | TCCCAGTCGCTCTCCATTTG | GCCAACTTCAGCTTCAACGG |
| ***pdhB*** | Pyruvate dehydrogenase | | CGAAACCGTTCTCGCAGT | GCGGCAATTAAAAGTCCCTTTG |
| ***ldh*** | Lactate dehydrogenase | | TTCCGATTAGTGTCTCCCGTTAT | TTATCAGCTACTAATTCAAGCCGAG |

Table S2. Primer sequences of virulence gene qPCR.

| **Name** | **Function** | **Forward** | **Reverse** |
| --- | --- | --- | --- |
| ***P97*** | Adhesion | AGTTCATCAAAGCGAGTA | ATCATTGGGTGGCTAAGTTTCTG |
| ***P216*** | Adhesion; Enhanced colonization ability | GGGACAGTTGTTGGCTTGG | AATTCCGAGATAACCACCTGATA |
| ***P146*** | Enhanced adhesion and inflammatory response | ATTGCCTCTTCTTGGTTTCCG | CGGGAAACTGATTTTTCAGTCGA |
| ***P95*** | Adhesion; Immune interference | CCCGAGTTAGTAAAGGTTCAGCA | GGACCTTCATCCTGGGAATCTG |
| ***rnc*** | Encodes ribonuclease III | CGAATTTCACTAGCACCTCTACC | GGGAAATTCAACCCAAATTCGATCC |
| ***smf*** | Encodes DNA-processing proteins that maintain genome stability | GTGATCCACCTGATTTCCGAATTG | ATCTCTGAATATCCAACAGGATGC |

**Supplementary Figures & Tables in Results**


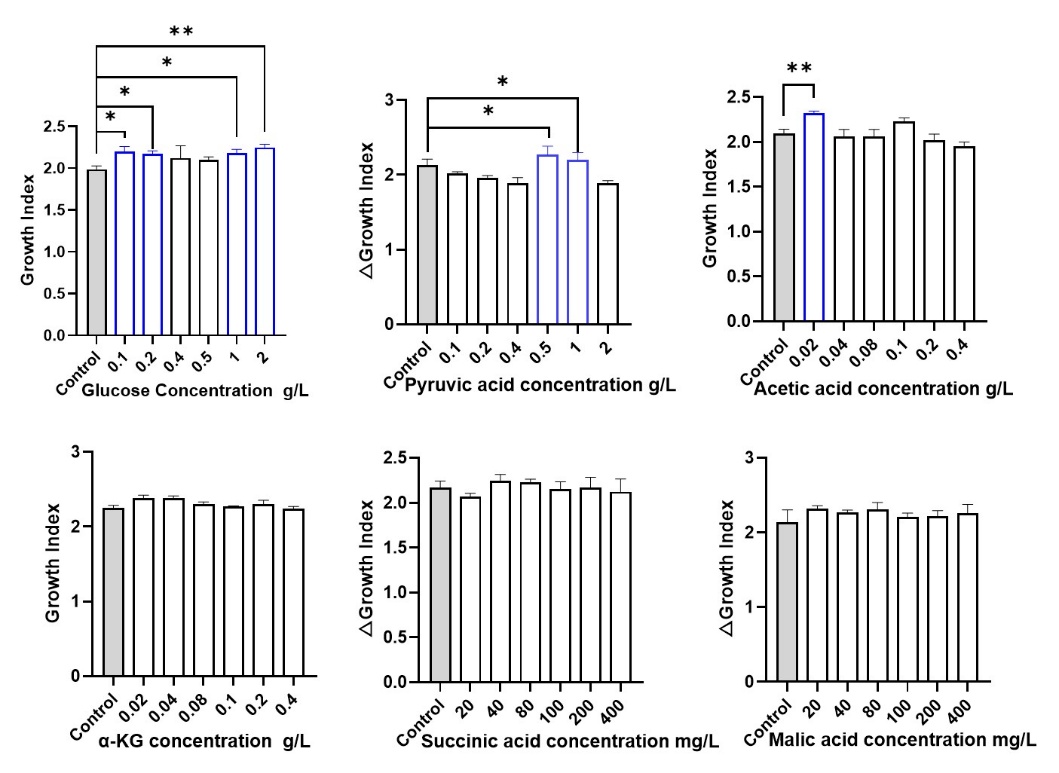


Fig. S1 **The influence of adding glucose and organic acids on the growth of *Mhp***

***
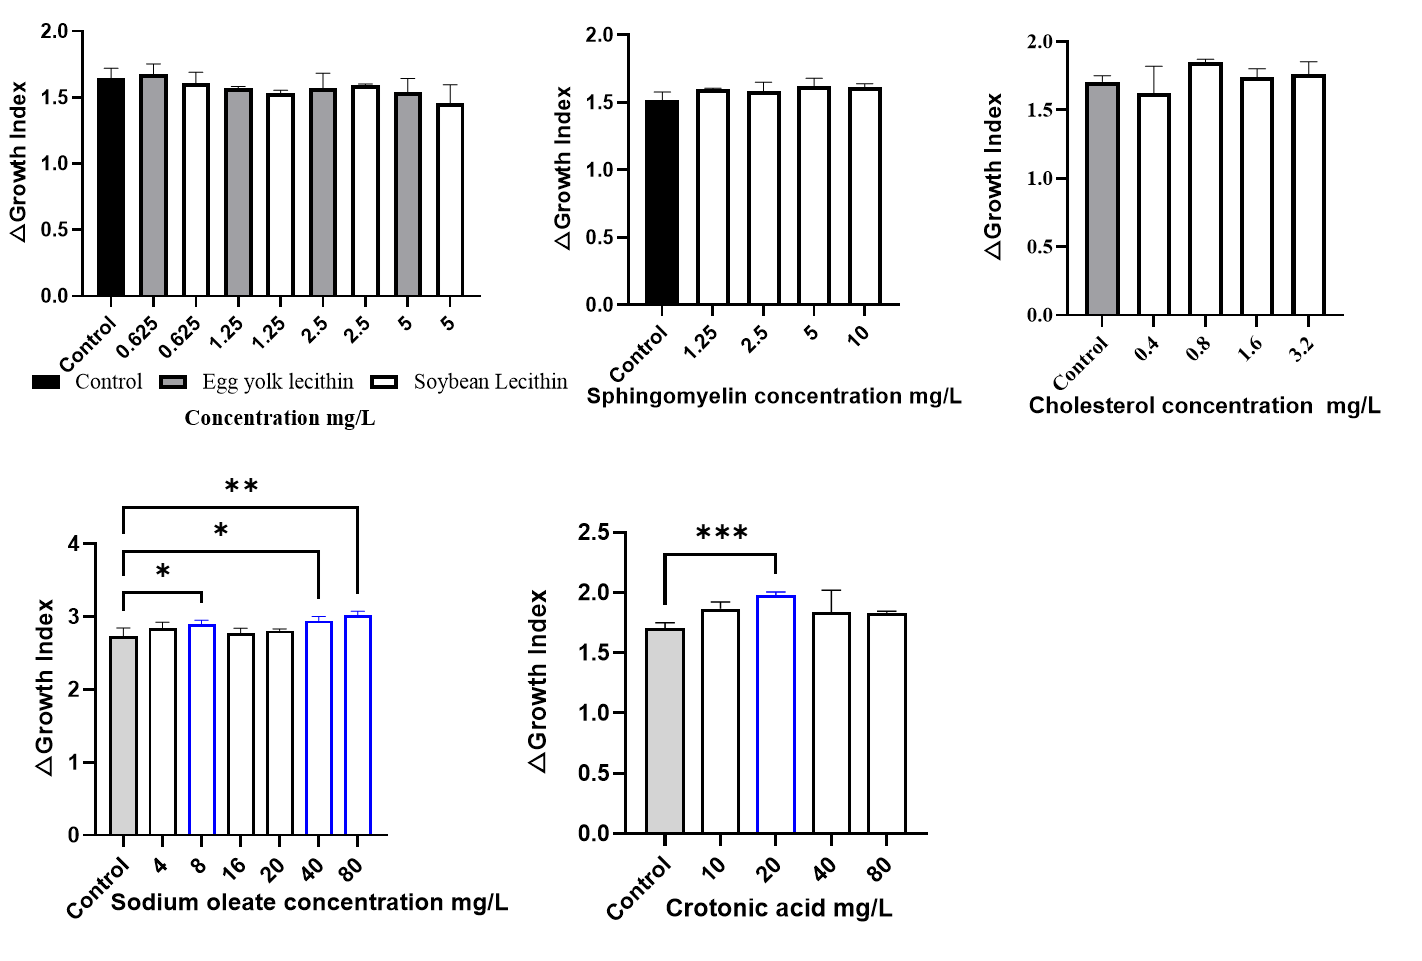
***

Fig. S2 **The influence of adding lipid substances on the growth of *Mhp***


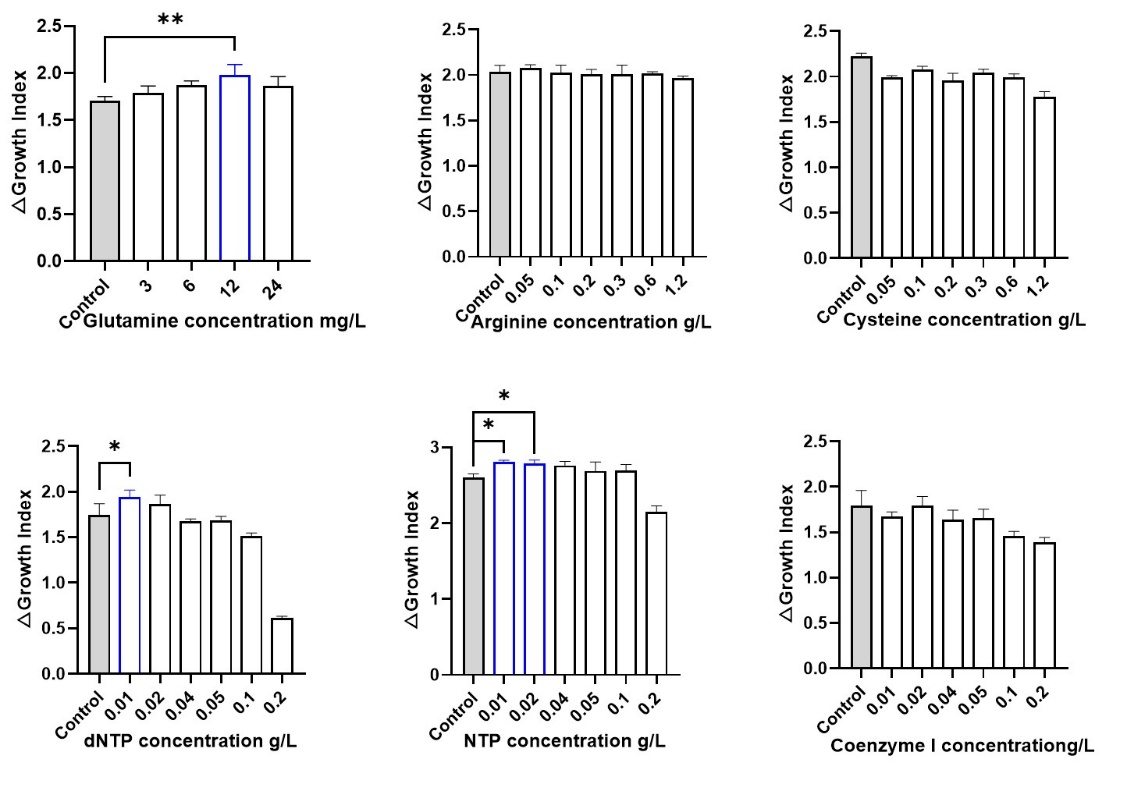


Fig. S3 **The influence of adding amino acid and nucleotide substances on the growth of *Mhp***
